# Supplementary material for: Efficient and safe gene transfection in fish spermatogonial stem cells using nanomaterials
Source: Royal Society of Chemistry journal article supplement (doi:10.1039/c6ra07010h), 2016-01-01
Supplement: c6ra07010h1.pdf [file c6ra07010h1.pdf]

## Efficient and safe gene transfection in fish spermatogonial stem cells using nanomaterials<sup>†</sup>

F. M. P. Tonelli,<sup>a</sup> S. M. S. N. Lacerda,<sup>b</sup> N. C. O. Paiva,<sup>a</sup> M. S. Lemos,<sup>b</sup> A. C. de Jesus,<sup>c</sup> F. G. Pacheco,<sup>d</sup> J. D. Corrêa-Junior,<sup>e</sup> L. O. Ladeira,<sup>c</sup> C. A. Furtado,<sup>d</sup> L. R. França<sup>b\*</sup> and R. R. Resende<sup>a\*</sup>

### Supplementary Material

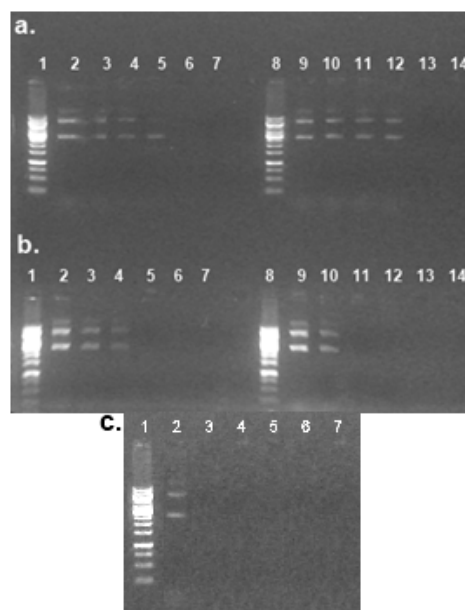

**Figure S1:** Binding capacity. **a.** Nanographene oxide (NGO) from  $10^{-7}$  (lane 2) to  $10^{-2}$  (lane 7) and nanodiamonds (NDs) from  $10^{-7}$  (lane 9) to  $10^{-2}$  (lane 14). **b.** gold nanorods (NRs) from  $10^{-7}$  (lane 2) to  $10^{-2}$  (lane 7) and multiwalled carbon nanotubes (MWCNT) from  $10^{-7}$  (lane 9) to  $10^{-2}$  (lane 14). **c.** Phosphate based nanocomposites (NPC) from  $10^{-7}$  (lane 2) to  $10^{-2}$  (lane 7). Lanes 1 and 8 – ladder 1kb. Nanomaterials were able to bind to plasmid DNA from concentrations equal or superior to: 10 ng/mL for NGO; 100 ng/mL for ND;  $1.3 \times 10^9$  particles/mL for NRs; 2.5 ng/mL for MWCNTs and 1 ng/mL for NPCs

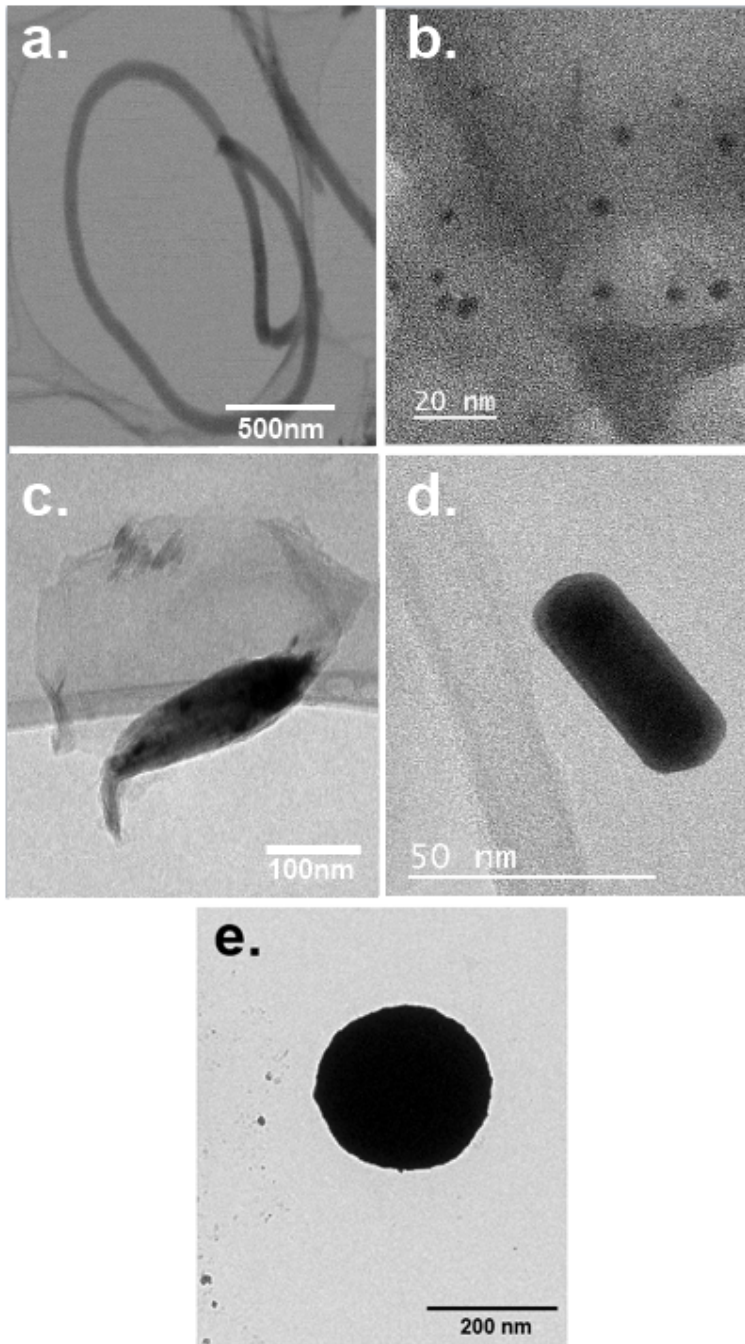

**Figure S2.** Transmission electron microscopy (TEM) images of nanomaterials. **a.** Multiwalled carbon nanotubes (MWCNTs). **b.** Nanodiamonds (ND). **c.** Nanographene oxide (NGO). **d.** Gold nanorods (NRs). **e.** Phosphate based nanocomposites (NPC).

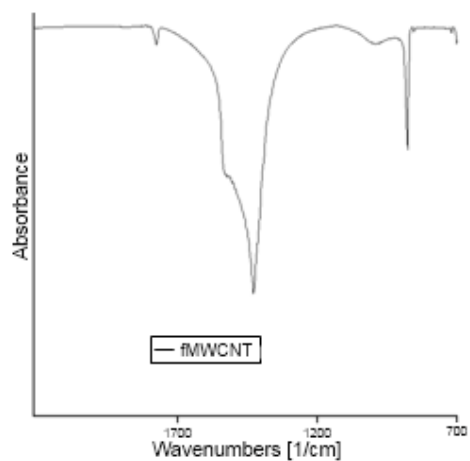

**Figure S3.** FTIR spectra of multiwalled carbon nanotubes(fMWCNTs).

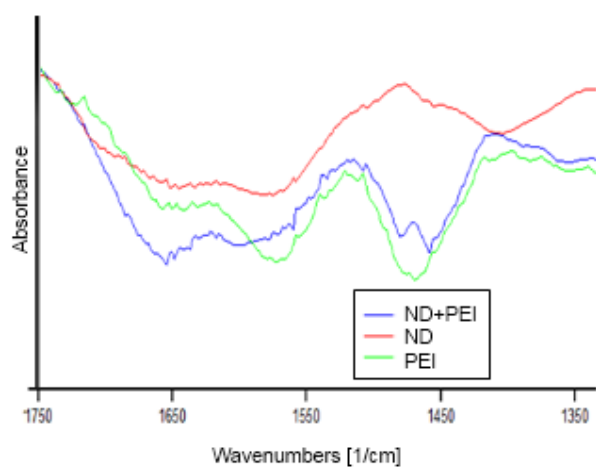

**Figure S4.** FTIR spectra of nanodiamonds (NDs).

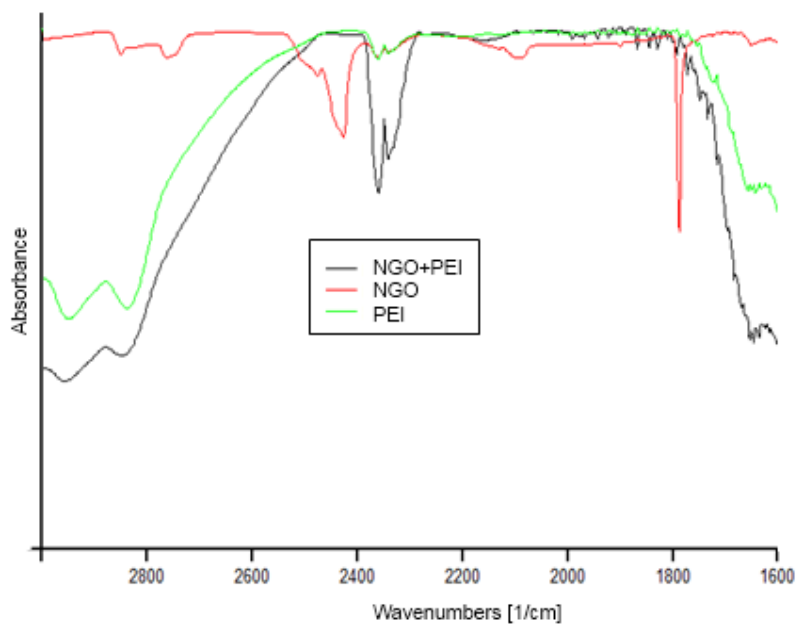

**Figure S5.** FTIR spectra of Nanographene oxide(NGOs).

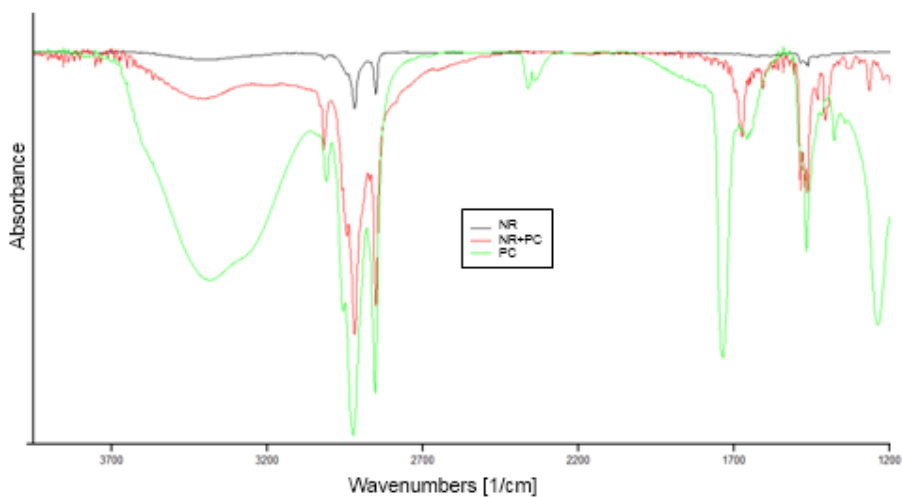

**Figure S6.** FTIR spectra of gold nanorods(NRs).

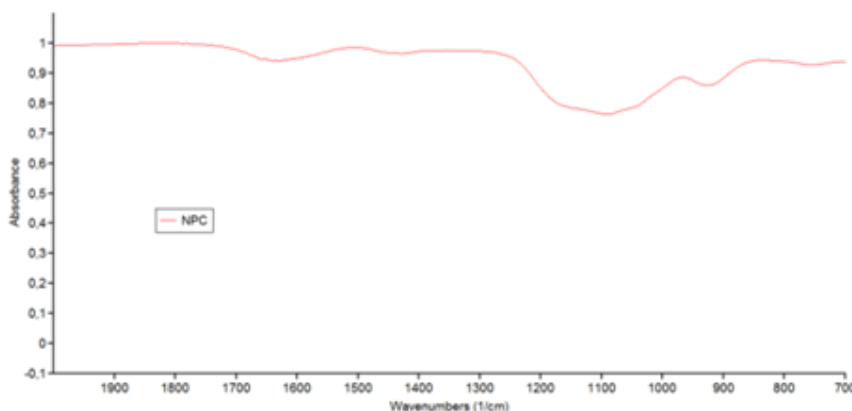

**Figure S7.** FTIR spectra of Phosphate based nanocomposites (NPCs).

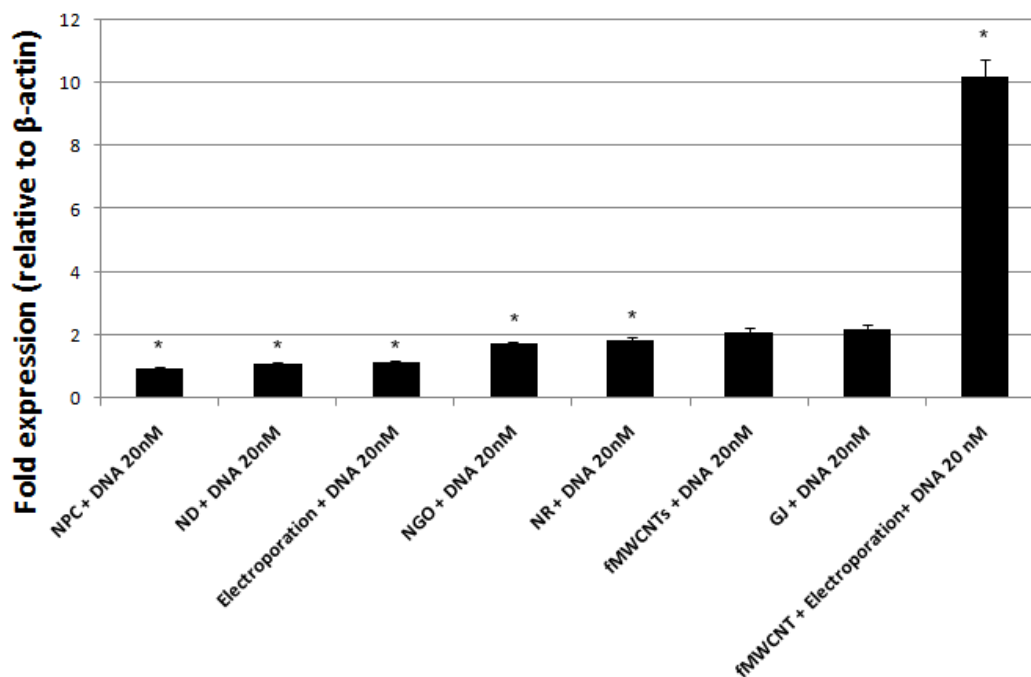

**Figure S8.** Dosage of transgene expression by qPCR. AmCyan1 mRNA synthesis in relation to β-actin using different strategies to promote transfection of SSCs. The results were compared to the ones from the commercial reagent Gene Juice® (GJ). Phosphate based nanocomposites (NPC), nanodiamonds (NDs), Nanographene oxide (NGO), gold nanorods (NRs), multiwalled carbon nanotubes (fMWCNTs) as vehicles. (asterisk,  $p < 0.05$ ,  $t$  test).

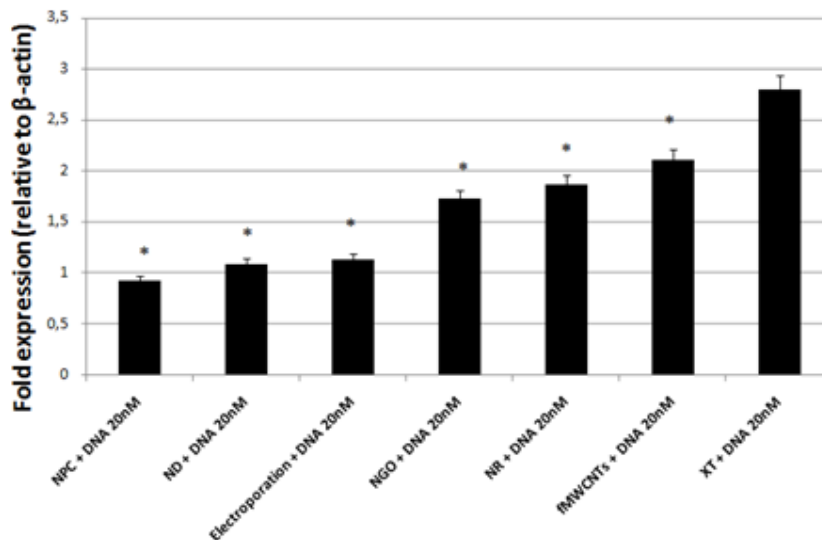

**Figure S9.** Dosage of transgene expression by qPCR. AmCyan1 mRNA synthesis in relation to  $\beta$ -actin using different strategies to promote transfection of SSCs. The results were compared to the ones from the commercial reagent X-treme. Phosphate based nanocomposites (NPC), nanodiamonds (NDs), Nanographene oxide (NGO), gold nanorods (NRs), multiwalled carbon nanotubes (fMWCNTs) as vehicles. Transfection was also assessed using the commercial reagent X-tremeGENE™ (XT) (asterisk,  $p < 0.05$ ,  $t$  test).
